# Supplementary material for: Protein Determination with Molecularly Imprinted Polymer Recognition Combined with Birefringence Liquid Crystal Detection
Source: Sensors (Basel). 2020 Aug 20;20(17):4692. doi: 10.3390/s20174692 (PMC7547379; doi:10.3390/s20174692)
Supplement: Supplementary file 1 [file sensors-20-04692-s001.docx]

Supporting Information

Protein Determination with Molecularly Imprinted Polymer Recognition Combined with Birefringence Liquid Crystal Detection

Maciej Cieplak 1,†, Rafał Węgłowski 2,†, Zofia Iskierko 1, Dorota Węgłowska 2,
Piyush S. Sharma 1, Krzysztof R. Noworyta 1,*, Francis D’Souza 3 and
Wlodzimierz Kutner 1,4

1 Institute of Physical Chemistry Polish Academy of Sciences, Kasprzaka Str. 44/52, 01-224 Warsaw, Poland;

[mcieplak@ichf.edu.pl](mailto:mcieplak@ichf.edu.pl) (M.C.); [ziskierko@ichf.edu.pl](mailto:ziskierko@ichf.edu.pl) (Z.I.); [psharma@ichf.edu.pl](mailto:psharma@ichf.edu.pl) (P.S.S.) [wkutner@ichf.edu.pl](mailto:wkutner@ichf.edu.pl) (W.K.)

2 Faculty of Advanced Technologies and Chemistry, Military University of Technology, Kaliskiego Str. 2, 00-908 Warsaw, Poland; [rafal.weglowski@wat.edu.pl](mailto:rafal.weglowski@wat.edu.pl) (R.W.); [dorota.weglowska@wat.edu.pl](mailto:dorota.weglowska@wat.edu.pl) (D.W.)

3 Department of Chemistry, University of North Texas, 1155 Union Circle No 305070, Denton, TX 76203-5017, USA; [francis.dsouza@unt.edu](mailto:francis.dsouza@unt.edu)

4 Faculty of Mathematics and Natural Sciences, School of Sciences, Cardinal Stefan Wyszynski University in Warsaw, Wóycickiego Str. 1/3, 01-815 Warsaw, Poland

* Correspondence: knoworyta@ichf.edu.pl; Tel.: +48-22-343-3217

† Both authors contributed equally to this work.

Received: 18 July 2020; Accepted: 17 August 2020; Published: date

Table of Contents

1. Potentiodynamic curves for MIP film deposition by electropolymerization S-2

2. SPR reflectivity curves for different MIP films S-3

3. Summary of optimization the film deposition conditions S-4

4. Surface plasmon resonance signal recorded during MIP and NIP film deposition S-5

5. Adhesion and deformation mapping of the MIP and NIP films S-6

6. MIP and NIP film properties determined by AFM and nanomechanical imaging S-7

1. Potentiodynamic Curves for MIP Film Deposition by Electropolymerization

**Figure S1.** Potentiodynamic curves for MIP film deposition by electropolymerization during (**a**) one, (**b**) two, or (**c**) three potential cycles. The potential ranged from 0 to 1.00 V vs. Ag quasi-reference electrode. The potential scan rate was 50 mV/s. The polymerization solution was 1 µM in cross-linking monomer **3**, 30 µg/mL in human serum albumin-functional monomers **1** and **2** conjugate, and 10 mM in tetrabutylammonium perchlorate in the acetonitryle and PBS (pH = 7.4) 100 : 100 (*v* : *v*.) mixture. The inset to (**a**) presents structural formulas of the monomers.

2. SPR Reflectivity Curves for Different MIP Films

**Figure S2.** SPR reflectivity curves for (1, 2) bare gold-coated SPR chips as well as Au film-coated SPR chips coated with the MIP films of (3) 33.4, (4) 53.2, and (5) 94.8 nm thickness. Measurements were performed in (1) air and using (2-5) PBS (pH = 7.4).

3. Summary of Optimization the Film Deposition Conditions

**Table S1.** Parameters used for the optimization of the MIP film deposition conditions and the summary of the results.

| **Procedure number** | **Cross-linking Monomer Concentration, µM** | **Supporting Electrolyte Concentra-tion,**  **mM** | **Applied Potential Range,**  **V vs. Ag** | **Number of Cycles** | **Electric Charge Passed,**  **µC** | **Film Thick-ness,**  **nm** | **SPR Signal** | **Color of the Deposited Film** |
| --- | --- | --- | --- | --- | --- | --- | --- | --- |
| 1 | 1 | 10 | 0–1.00 | 1 | 159.2 | 33.4 (±4.7)a  16.1 (±1.6)b | Clear SPR signal | Transpa-rent |
| 2 | 1 | 10 | 0–1.00 | 2 | 253.5 | 53.2c | Broad signal. No clear mini-mum of the reflectance | Uniformly pink |
| 3 | 1 | 10 | 0–1.00 | 3 | 451.9 | 94.8c | No SPR resonance | Non-uniform, from pink to dark-blue |
| 4 | 10 | 100 | 0–1.20 | 50 | - | 250–500b | - | - |
| 5 | 0.5 | 10 | 0–1.00 | 1 | - | - | - | - |

a Film thickness determined with AFM.

b Film thickness after HSA extraction determined using AFM.

c Film thickness estimated based on the charge passed.

4. Surface Plasmon Resonance Signal Recorded during MIP and NIP Film Deposition

**Figure S3.** Changes in the SPR signal with the time recorded during deposition of the film of (*1*) MIP and (*2*) NIP by electropolymerization under potentiodynamic conditions. Compositions of the solutions are indicated at curves.

a (TBA)ClO4 – tetrabutylammonium perchlorate.

5. Adhesion and Deformation Mapping of the MIP and NIP Films


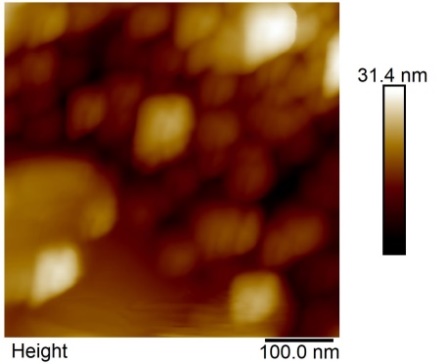

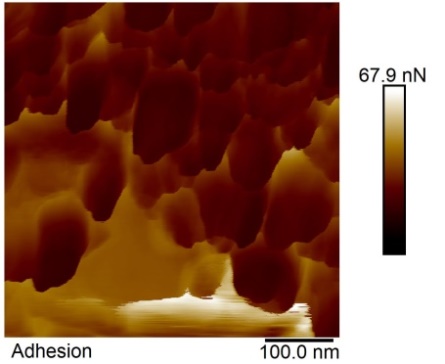

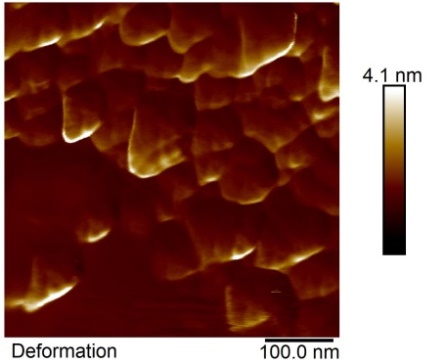


**a’’**

**a’**

**a**


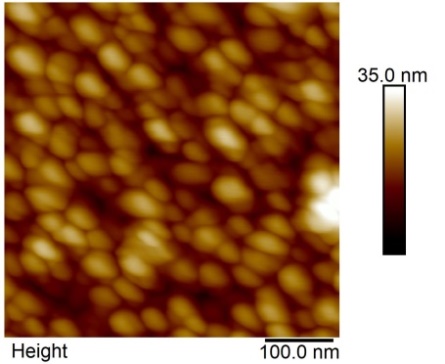

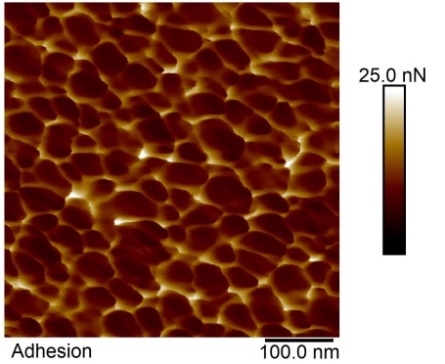

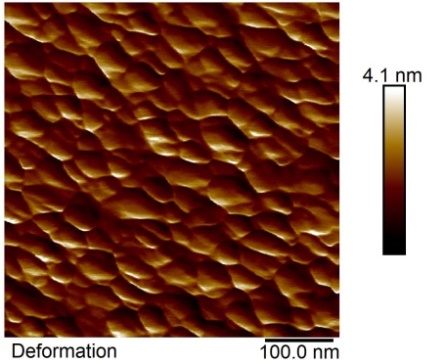


**b’’’**

**b’**

**b**


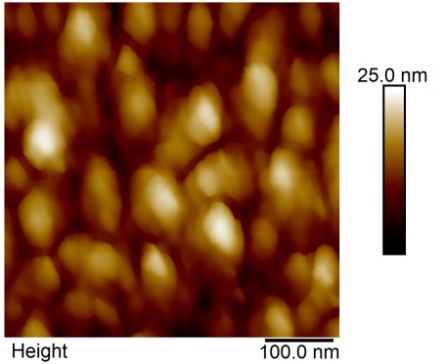

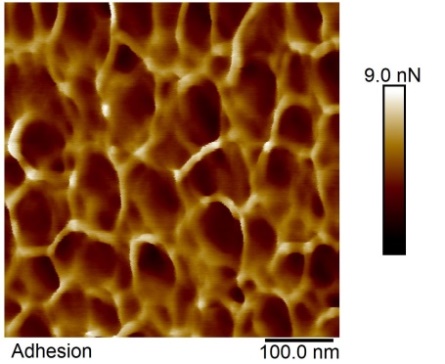

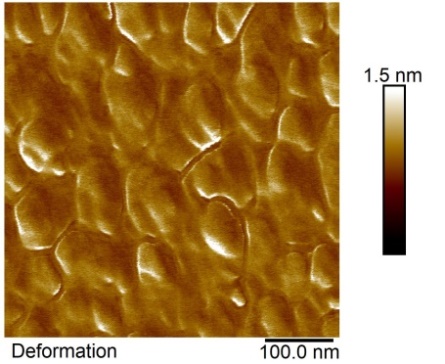


**c’’**

**c’**

**c**

**Figure S4.** Adhesion and deformation maps (500 × 500 nm2) of the (a, a’, and a’’) MIP film, (b, b’, and b’’) HSA extracted MIP film, and (c, c’, and c’’) NIP films deposited by electropolymerization on Au film-coated glass slides.

6. MIP and NIP Film Properties Determined by AFM and Nanomechanical Imaging

**Table S2.** Selected properties of MIP and NIP films derived from the AFM and nanomechanical images.

| **Film** | **Thickness, nm** | **Roughness, *R*a, nm** | **Adhesion, nN** | **Deformation, nm** |
| --- | --- | --- | --- | --- |
| MIP before HSA extraction | 33.4 ± 4.7 | 3.7 ± 1.2 | 16.5 ± 6.0 | 0.0 ± 0.4 |
| MIP after HSA extraction | 16.1 ± 1.6 | 4.3 ± 1.1 | 5.0 ± 2.4 | 0.0 ± 0.5 |
| NIP | 11.7 ± 1.4 | 2.7 ± 0.2 | 4.2 ± 1.1 | 0.0 ± 0.4 |
